# Supplementary material for: Haptic feedback combined with movement sonification using a friction sound improves task performance in a virtual throwing task
Source: Springer Nature journal article supplement (doi:10.1007/s12193-018-0264-4), 2018-05-09
Supplement: MOESM3 [file 15752876]

## Sheet: PerformanceMeasures
SubjectNo	ErrorRateCondVH	ErrorRateCondV	ErrorRateCondAVH1	ErrorRateCondAVH2	ErrorRateCondAV1	ErrorRateCondAV2	TaskDurationCondVH	TaskDurationCondV	TaskDurationCondAVH1	TaskDurationCondAVH2	TaskDurationCondAV1	TaskDurationCondAV2
4	7	10	15	8	8	4	238	233	398	236	225	171
5	5	4	2	0	3	16	170	137	112	97	108	211
6	10	10	7	0	9	4	217	194	200	116	204	132
7	6	2	4	3	5	6	213	149	201	186	192	249
8	7	51	2	8	14	23	226	630	144	188	258	376
9	4	6	61	11	2	6	253	339	1220	475	187	261
10	3	8	6	7	8	3	120	173	175	173	207	132
11	15	10	15	24	10	9	303	198	273	391	215	213
12	4	9	5	16	16	8	179	195	176	301	302	214
13	1	7	6	6	1	5	113	178	158	169	106	186
14	9	32	12	6	29	21	245	457	394	188	398	302
15	7	38	6	12	15	13	240	716	239	282	367	265
16	5	2	2	3	6	3	227	168	182	189	223	249
17	3	2	1	9	2	12	133	227	119	204	124	207
18	15	34	1	5	2	9	224	419	100	141	114	213
19	9	13	6	6	5	5	219	250	222	224	172	167
20	1	4	2	5	2	1	166	212	174	245	168	153
21	10	4	31	8	18	18	300	208	601	274	544	436
22	7	14	3	3	2	17	211	325	140	123	129	281
23	19	43	3	6	21	9	348	712	187	205	350	252
